# Supplementary material for: Photoactive glycoconjugates with a very large Stokes shift: synthesis, photophysics, and copper(ii) and BSA sensing
Source: Royal Society of Chemistry journal article supplement (doi:10.1039/d3ob01388j), 2023-01-01
Supplement: d3ob01388j1.pdf [file d3ob01388j1.pdf]

## Supplementary Information

### **Photoactive glycoconjugates with very large Stokes shift. Synthesis, photophysics, and copper (II) and BSA sensing**

Cláudia Brito da Silva,<sup>a</sup> Luana Silva,<sup>b</sup> Natalí Pires Debia,<sup>b</sup> Otávio Augusto Chaves,<sup>c,d</sup>  
Diogo Seibert Lüdtker<sup>\*b</sup> and Fabiano Severo Rodembusch<sup>\*a</sup>

<sup>a</sup>Grupo de Pesquisa em Fotoquímica Orgânica Aplicada. Instituto de Química (UFRGS), Av. Bento Gonçalves, 9500, CEP 91501-970. Porto Alegre-RS, Brazil.

<sup>b</sup>Instituto de Química, Universidade Federal do Rio Grande do Sul, UFRGS, Av. Bento Gonçalves 9500, 91501-970 Porto Alegre, RS, Brazil.

<sup>c</sup>CQC-IMS, Departamento de Química, Universidade de Coimbra, Rua Larga, 3004-535 Coimbra, Portugal.

<sup>d</sup>Laboratório de Imunofarmacologia, Centro de Pesquisa, Inovação e Vigilância em COVID-19 e Emergências Sanitárias (CPIV), Instituto Oswaldo Cruz (IOC), Fundação Oswaldo Cruz (Fiocruz), Av. Brasil 4036 - Bloco 2, 21040-361 Rio de Janeiro – RJ, Brazil

### Summary

|                                     |    |
|-------------------------------------|----|
| Spectroscopic characterization..... | 2  |
| Additional UV-vis spectra.....      | 14 |
| Additional docking data.....        | 31 |

## Spectroscopic characterization

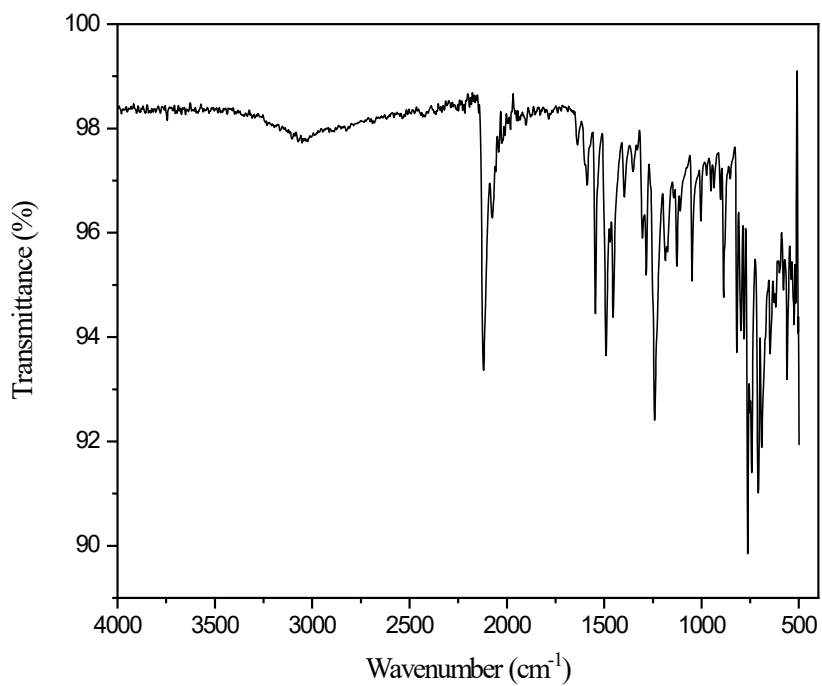

**Fig. S1** FTIR spectrum (ATR mode) of compound **3**.

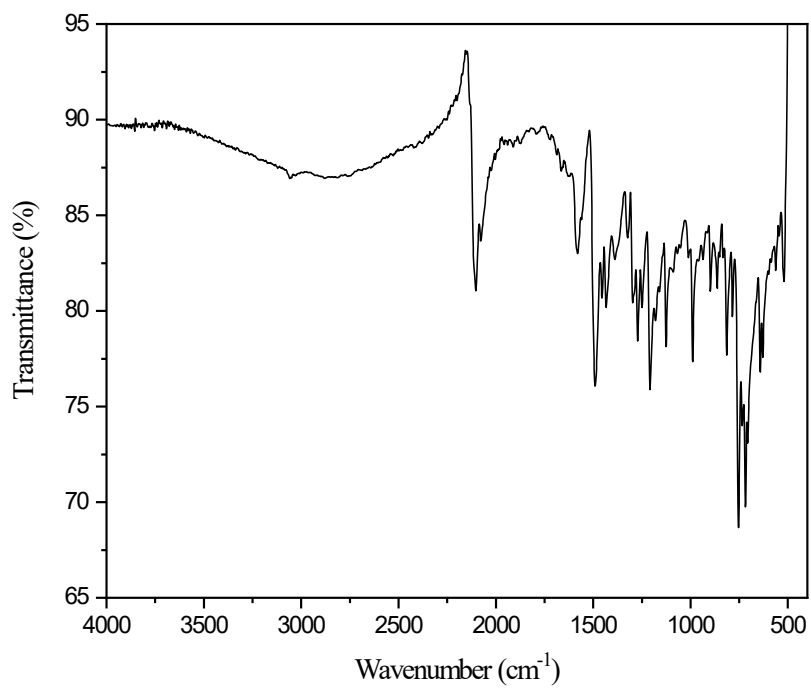

**Fig. S2** FTIR spectrum (ATR mode) of compound **4**.

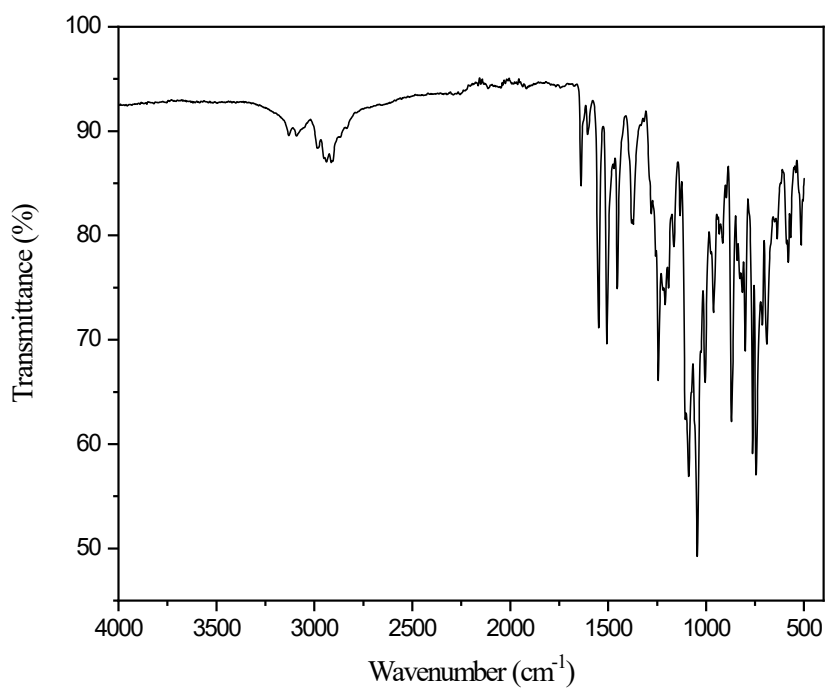

**Fig. S3** FTIR spectrum (ATR mode) of compound **15**.

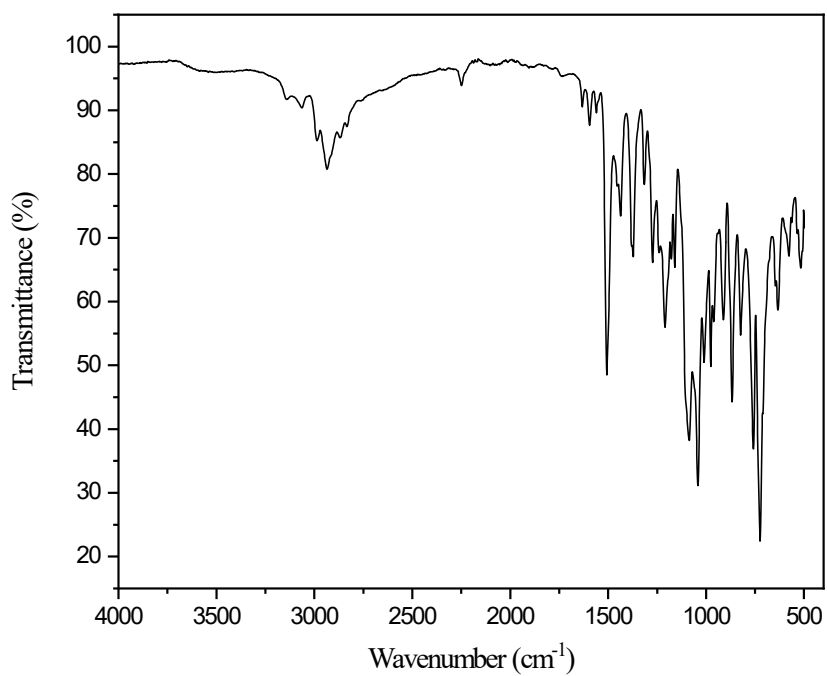

**Fig. S4** FTIR spectrum (ATR mode) of compound **16**.

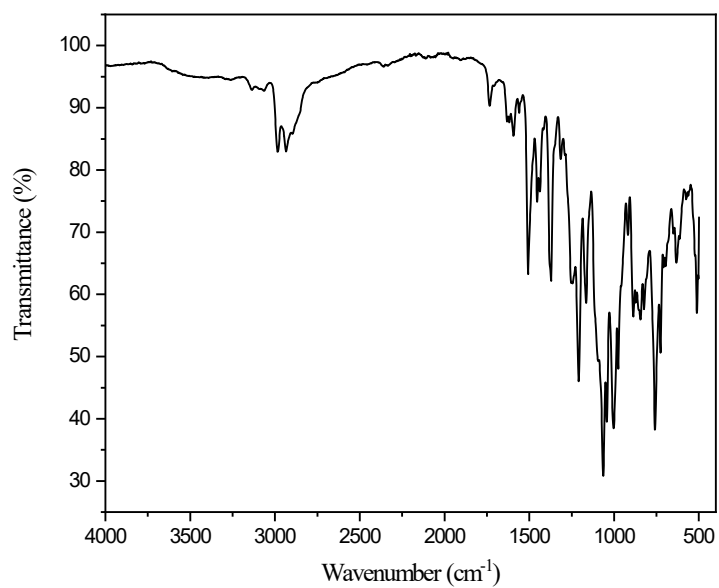

**Fig. S5** FTIR spectrum (ATR mode) of compound **17**.

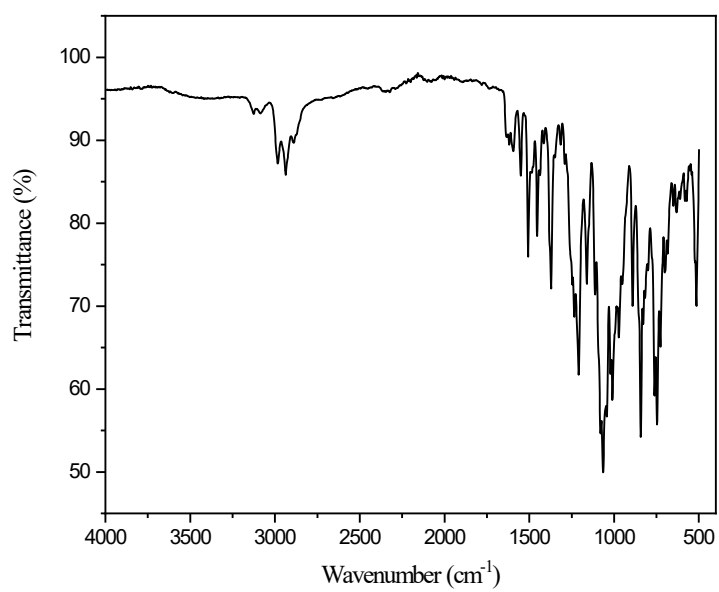

**Fig. S6** FTIR spectrum (ATR mode) of compound **18**.

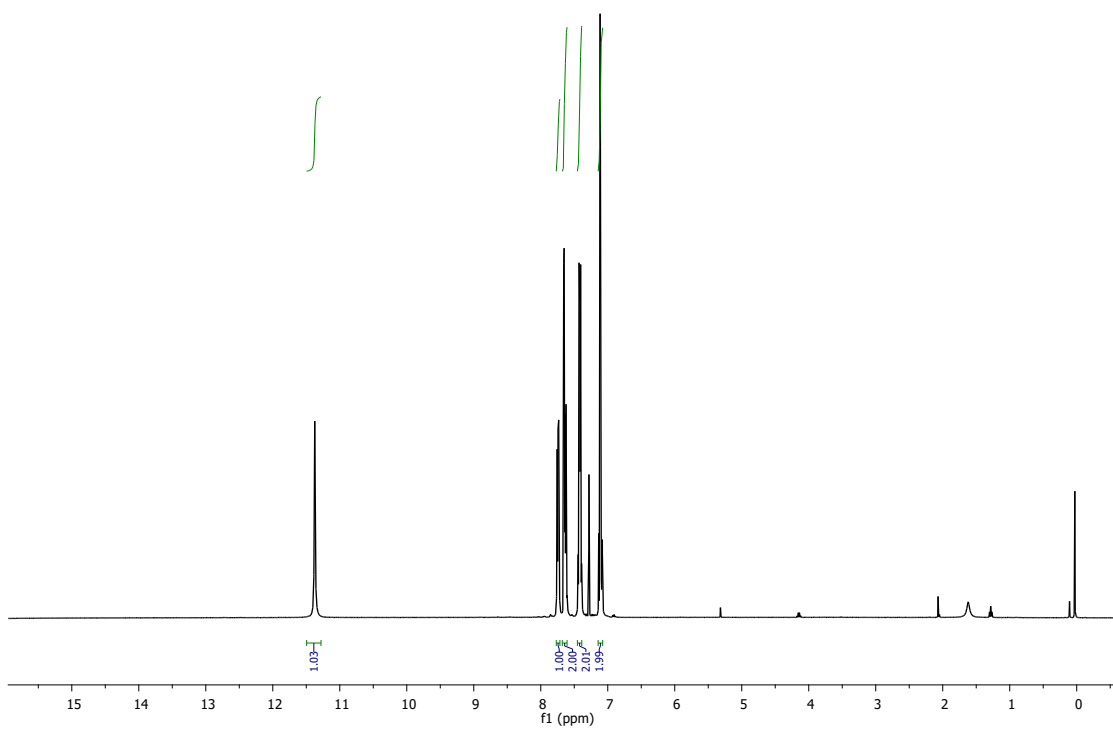

**Fig. S7**  $^1\text{H}$  NMR spectrum (400 MHz,  $\text{CDCl}_3$ ) of compound **3**.

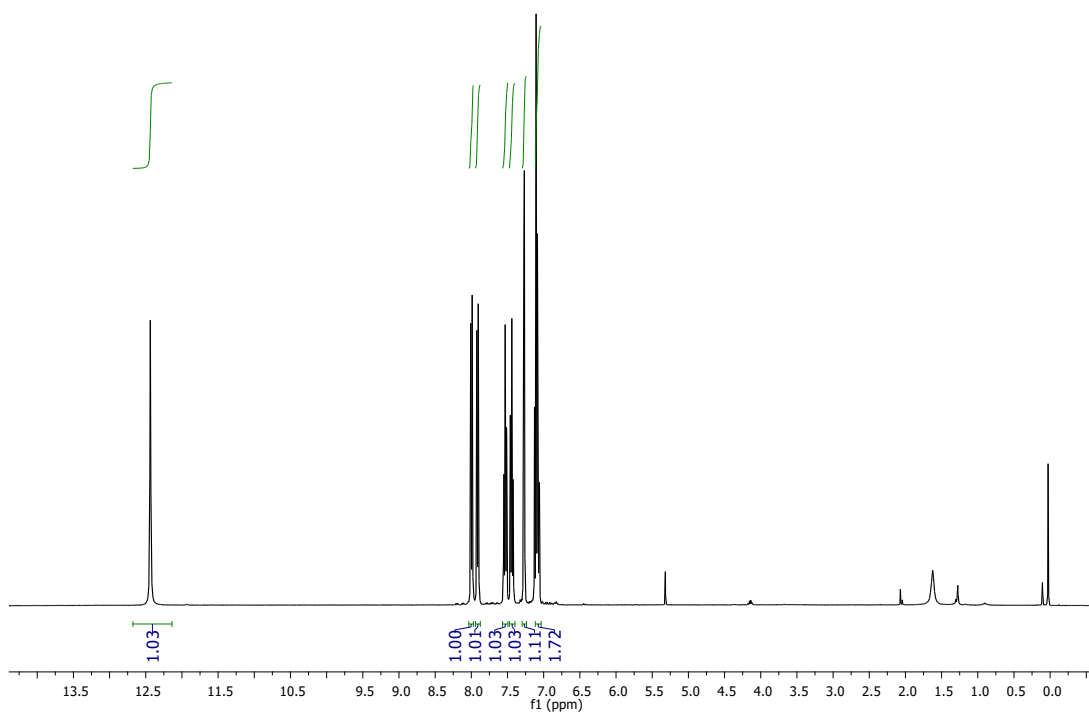

**Fig. S8**  $^1\text{H}$  NMR spectrum (400 MHz,  $\text{CDCl}_3$ ) of compound **4**.

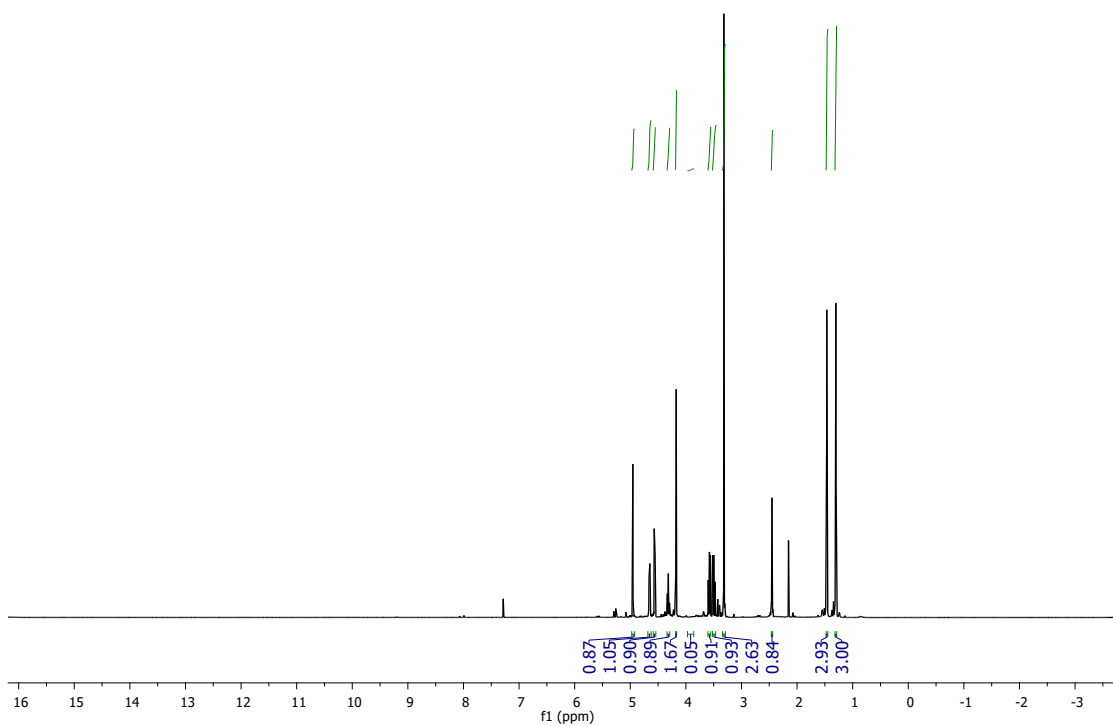

**Fig. S9** <sup>1</sup>H NMR spectrum (400 MHz, CDCl<sub>3</sub>) of compound **8**.

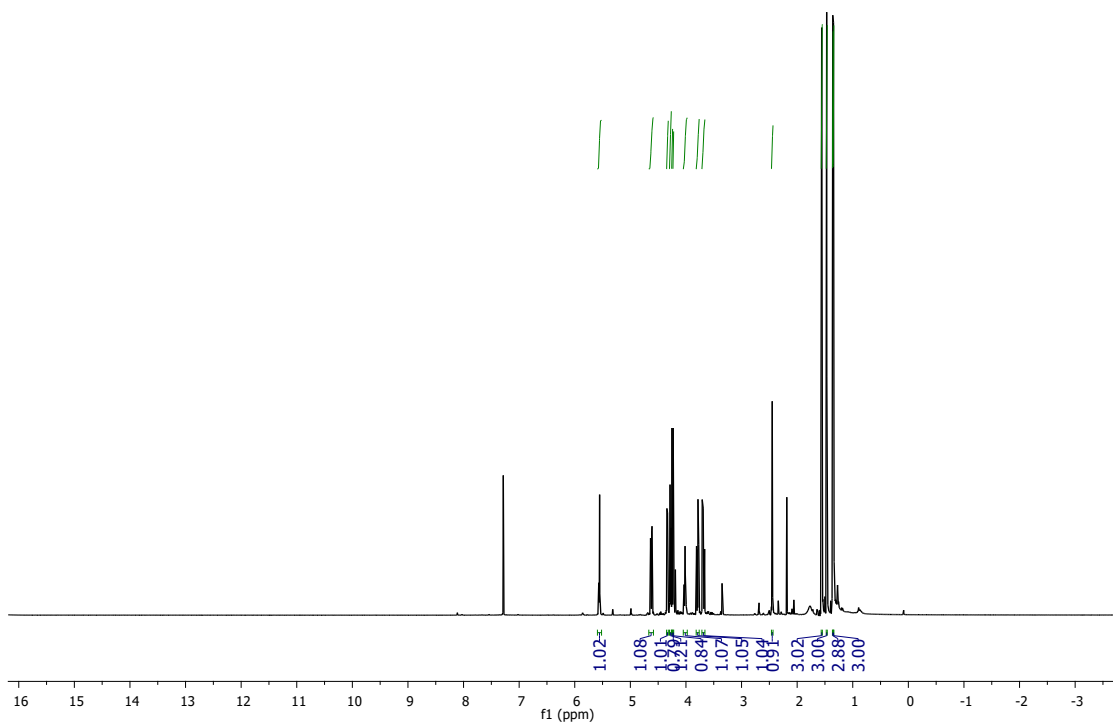

**Fig. S10** <sup>1</sup>H NMR spectrum (400 MHz, CDCl<sub>3</sub>) of compound **11**.

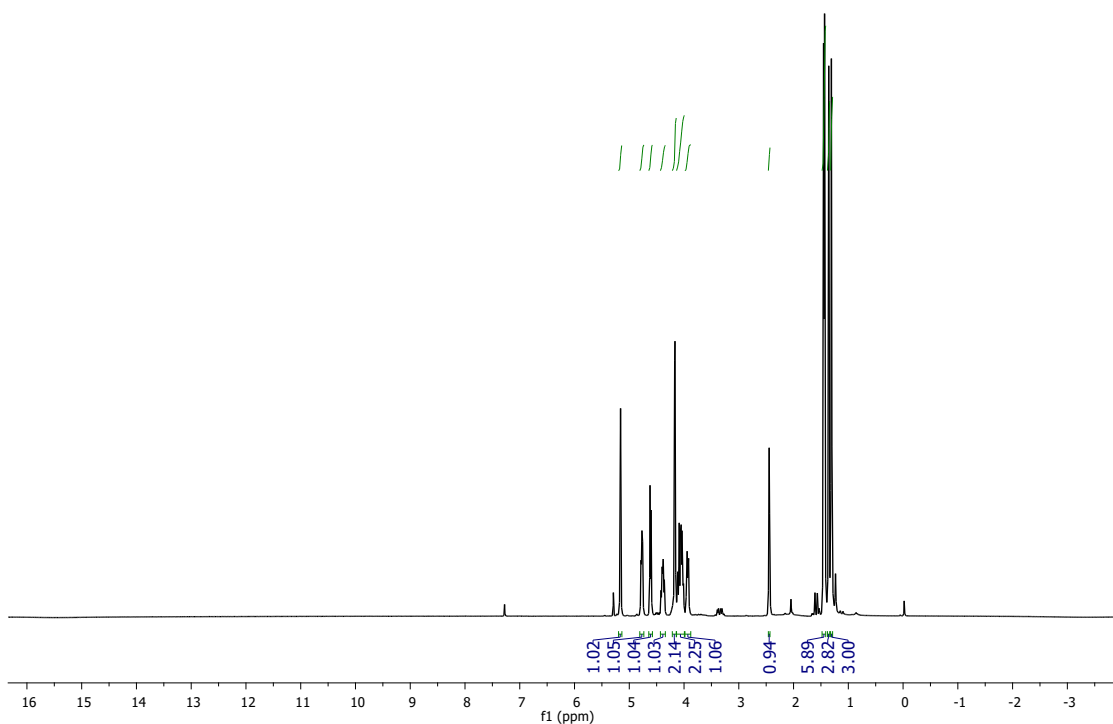

Fig. S11  $^1\text{H}$  NMR spectrum (400 MHz,  $\text{CDCl}_3$ ) of compound 14.

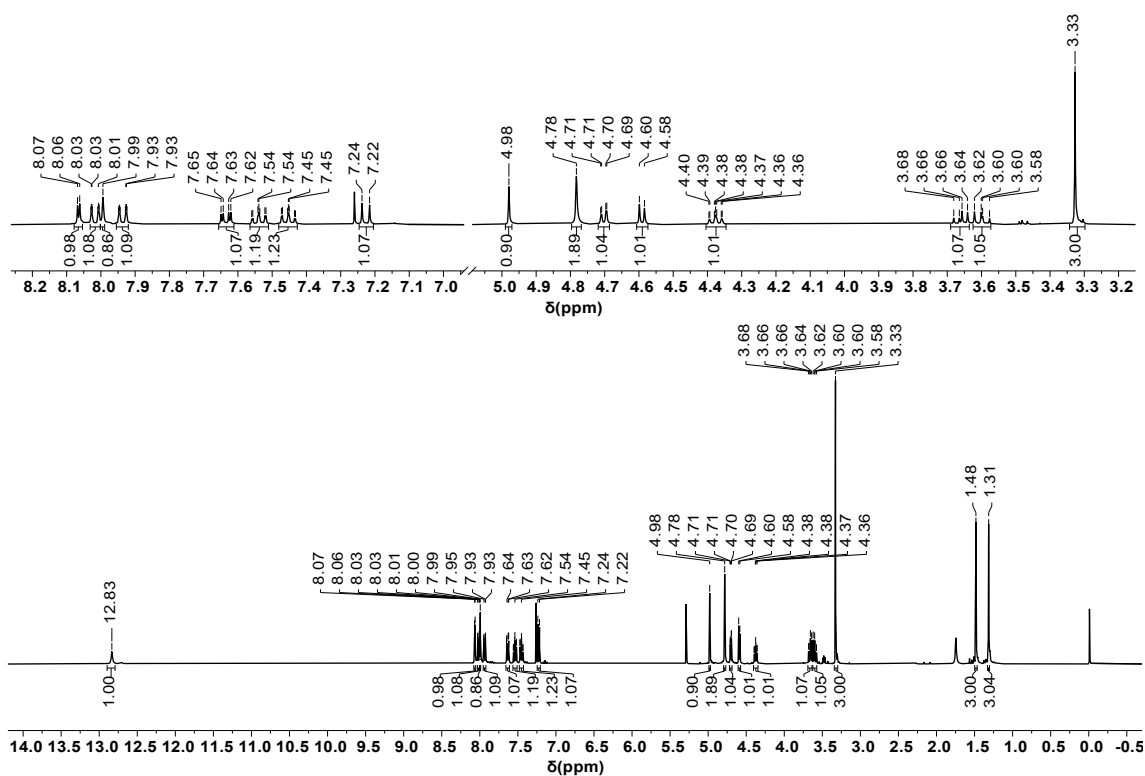

Fig. S12  $^1\text{H}$  NMR spectrum with amplification (400 MHz,  $\text{CDCl}_3$ ) of compound 15.

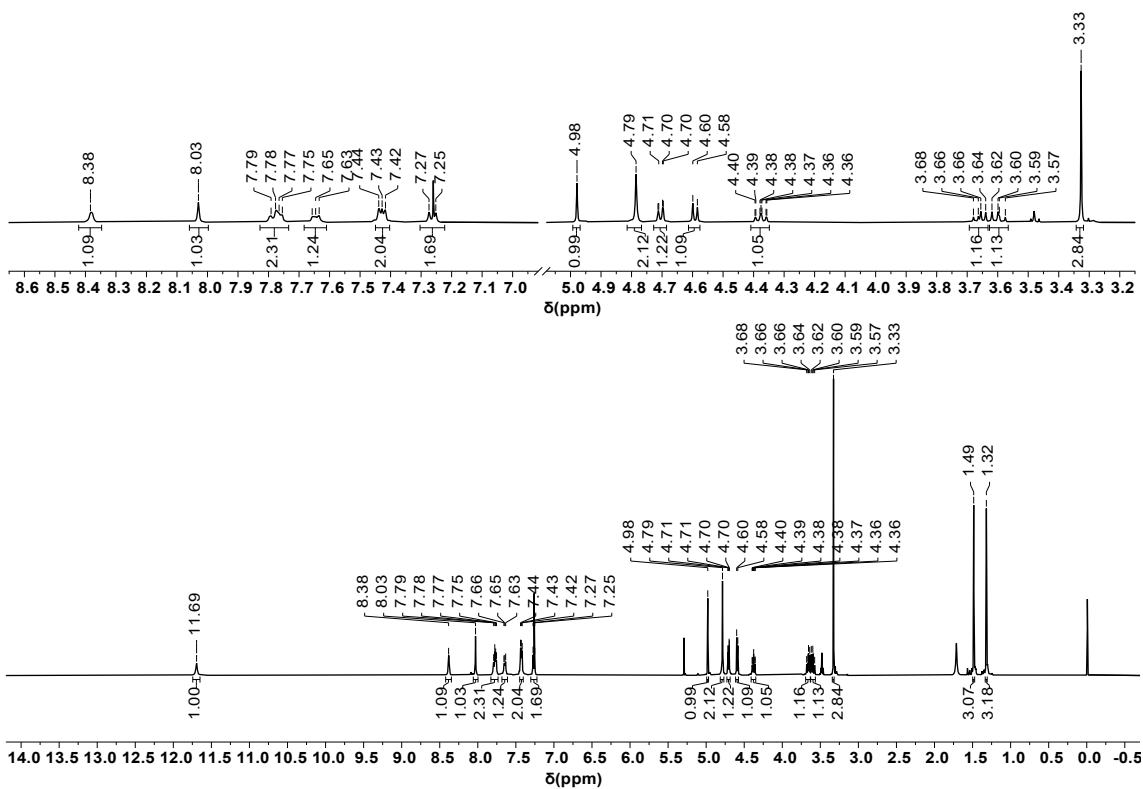

**Fig. S13** <sup>1</sup>H NMR spectrum with amplification (400 MHz, CDCl<sub>3</sub>) of compound 16.

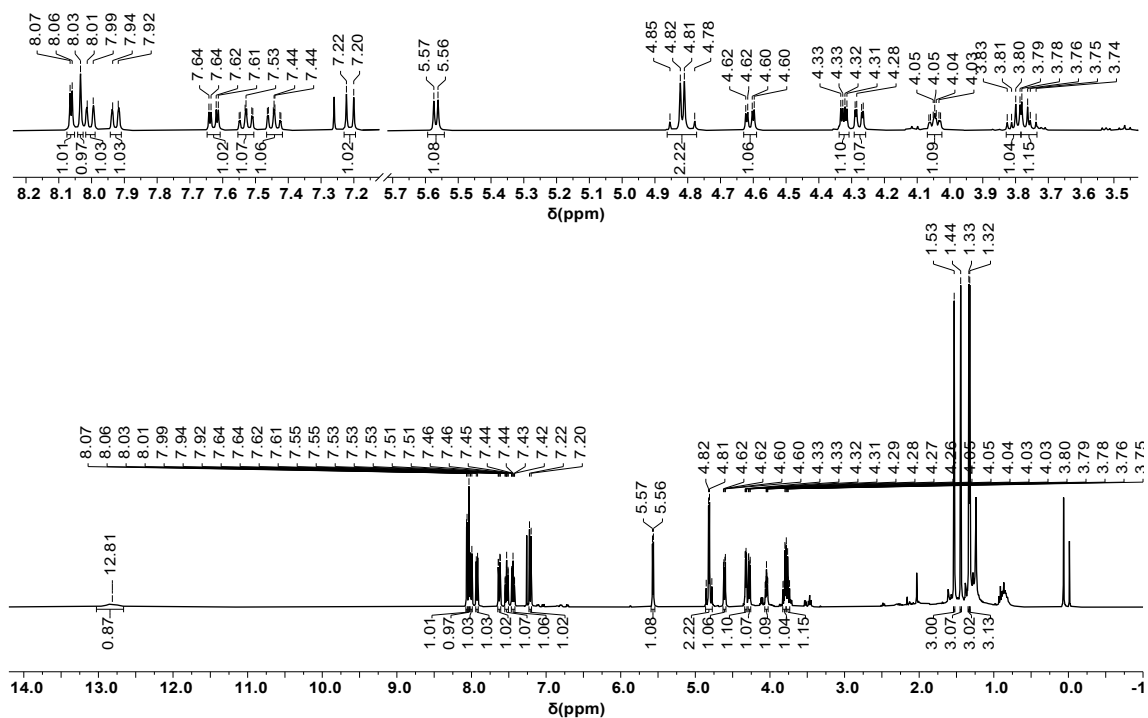

**Fig. S14** <sup>1</sup>H NMR spectrum with amplification (400 MHz, CDCl<sub>3</sub>) of compound 17.



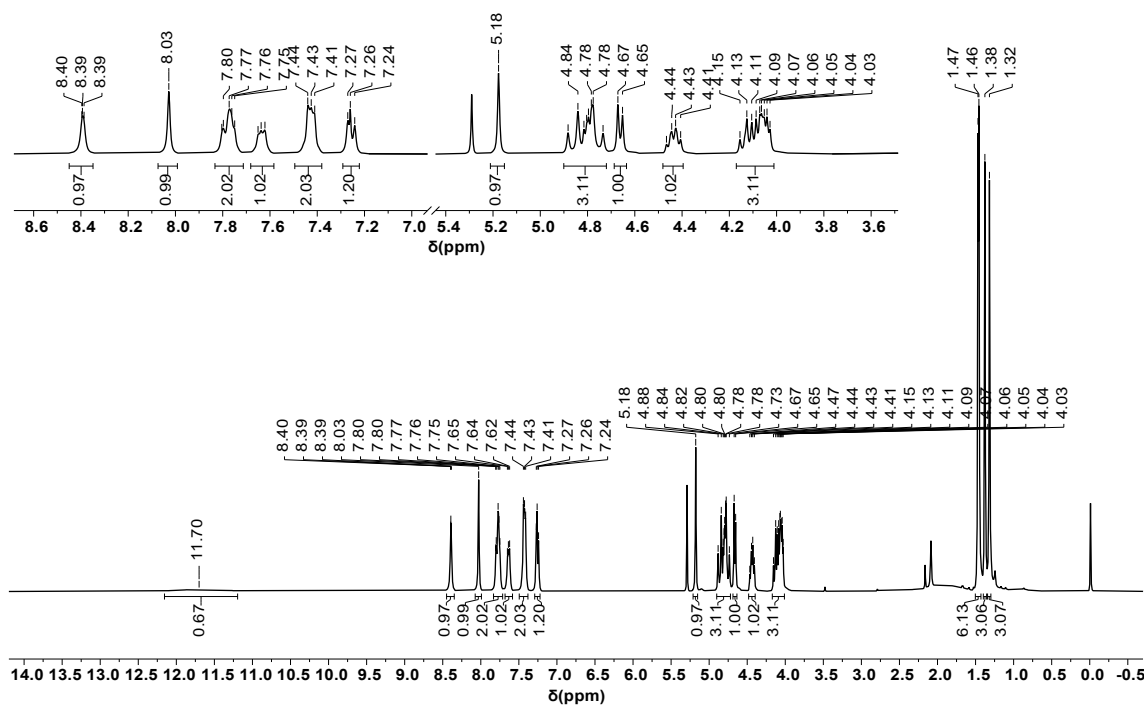

**Fig. S15**  $^1\text{H}$  NMR spectrum with amplification (400 MHz,  $\text{CDCl}_3$ ) of compound **18**.

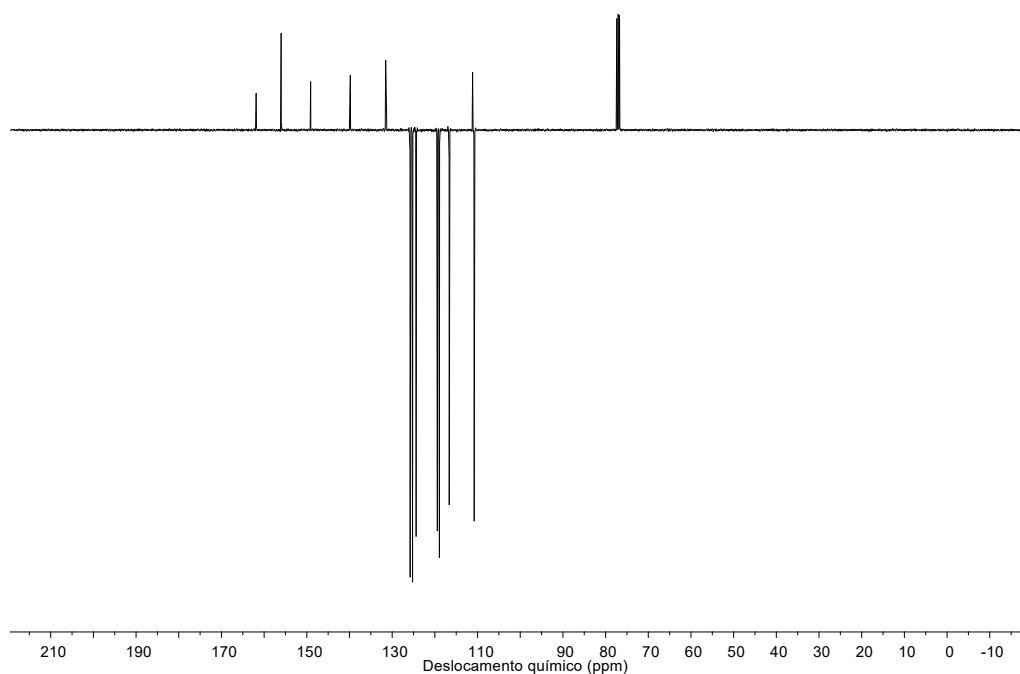

**Fig. S16**  $^{13}\text{C}$ -APT NMR spectrum (101 MHz,  $\text{CDCl}_3$ ) of compound **3**.

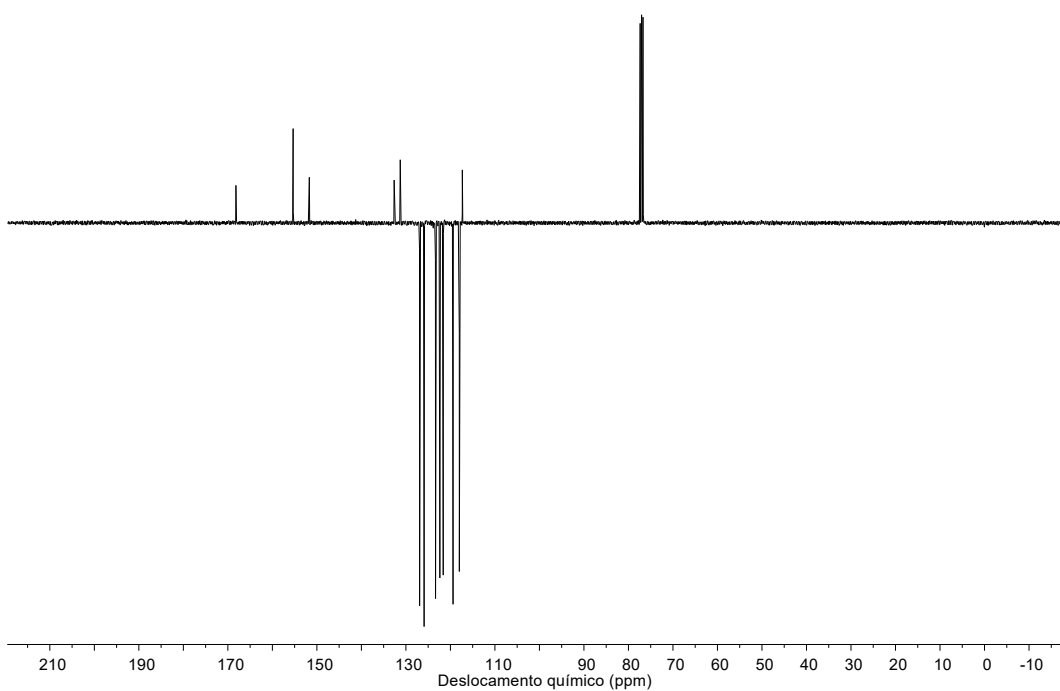

**Fig. S17** <sup>13</sup>C-APT NMR spectrum (101 MHz, CDCl<sub>3</sub>) of compound **4**.

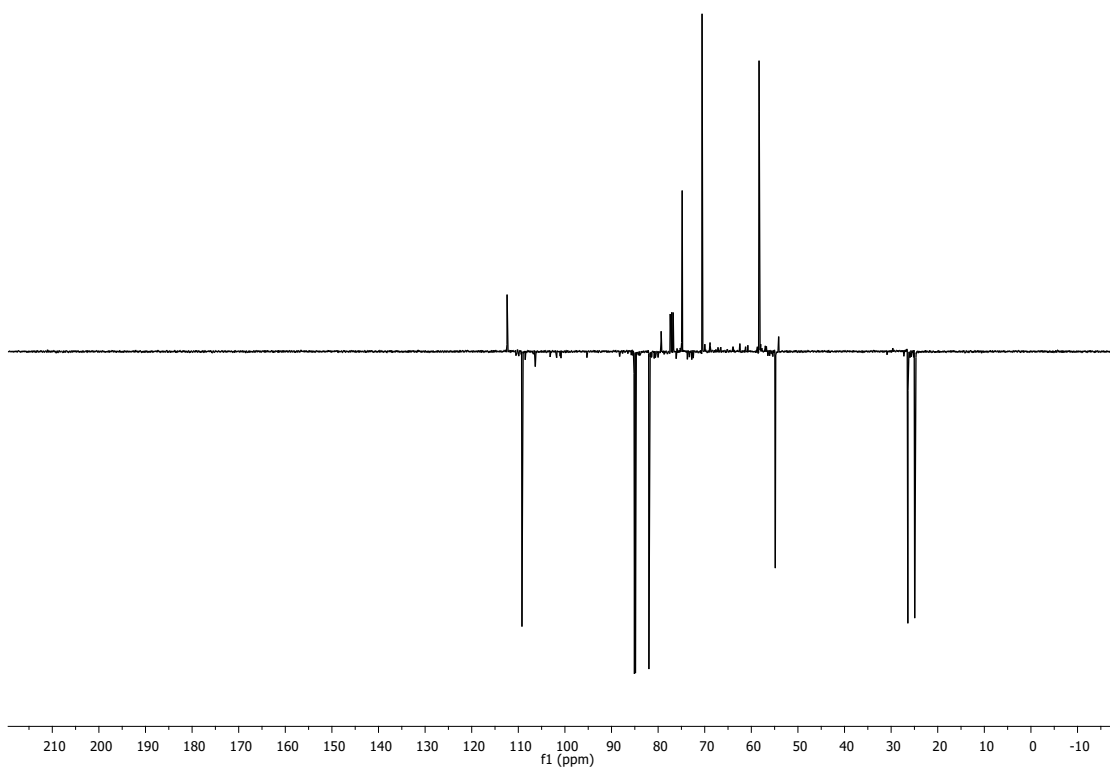

**Fig. S18** <sup>13</sup>C-APT NMR spectrum (101 MHz, CDCl<sub>3</sub>) of compound **8**.

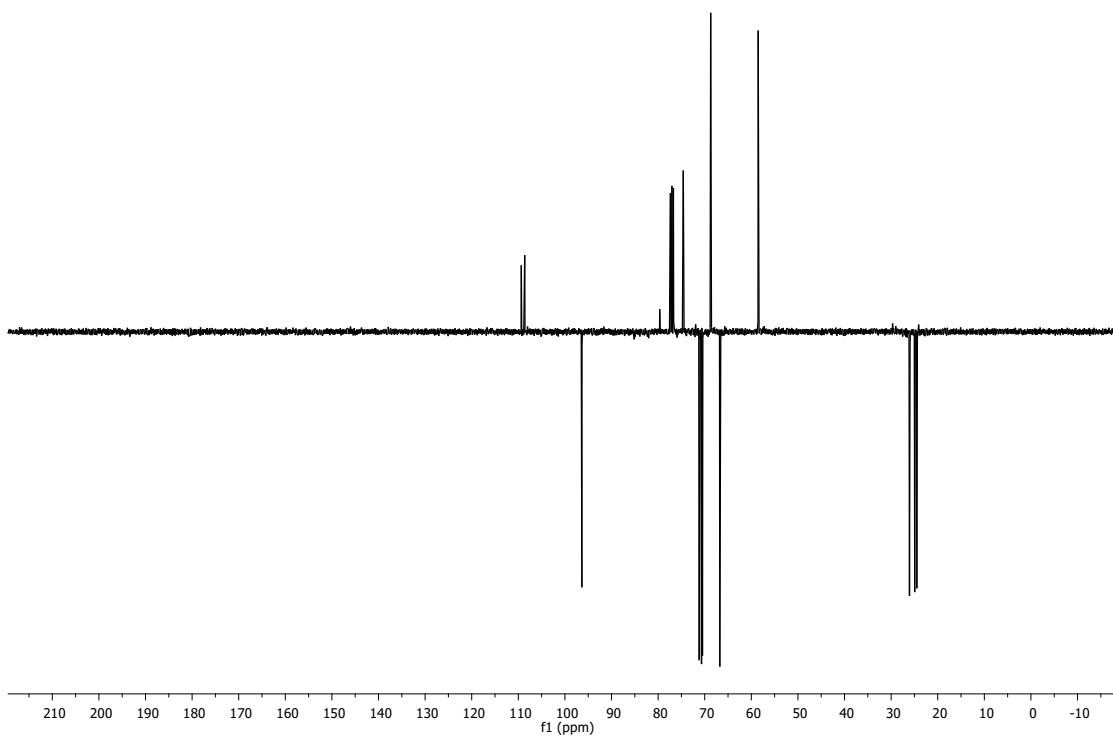

**Fig. S19** <sup>13</sup>C-APT NMR spectrum (101 MHz, CDCl<sub>3</sub>) of compound **11**.

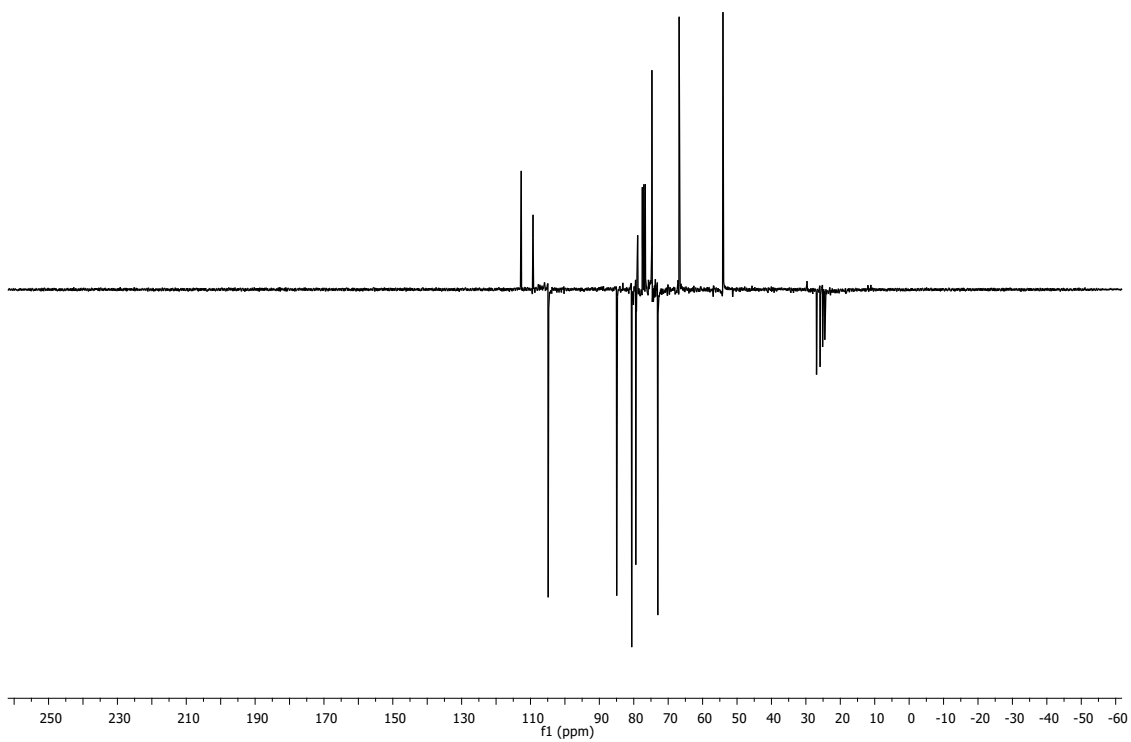

**Fig. S20** <sup>13</sup>C-APT NMR spectrum (101 MHz, CDCl<sub>3</sub>) of compound **14**.

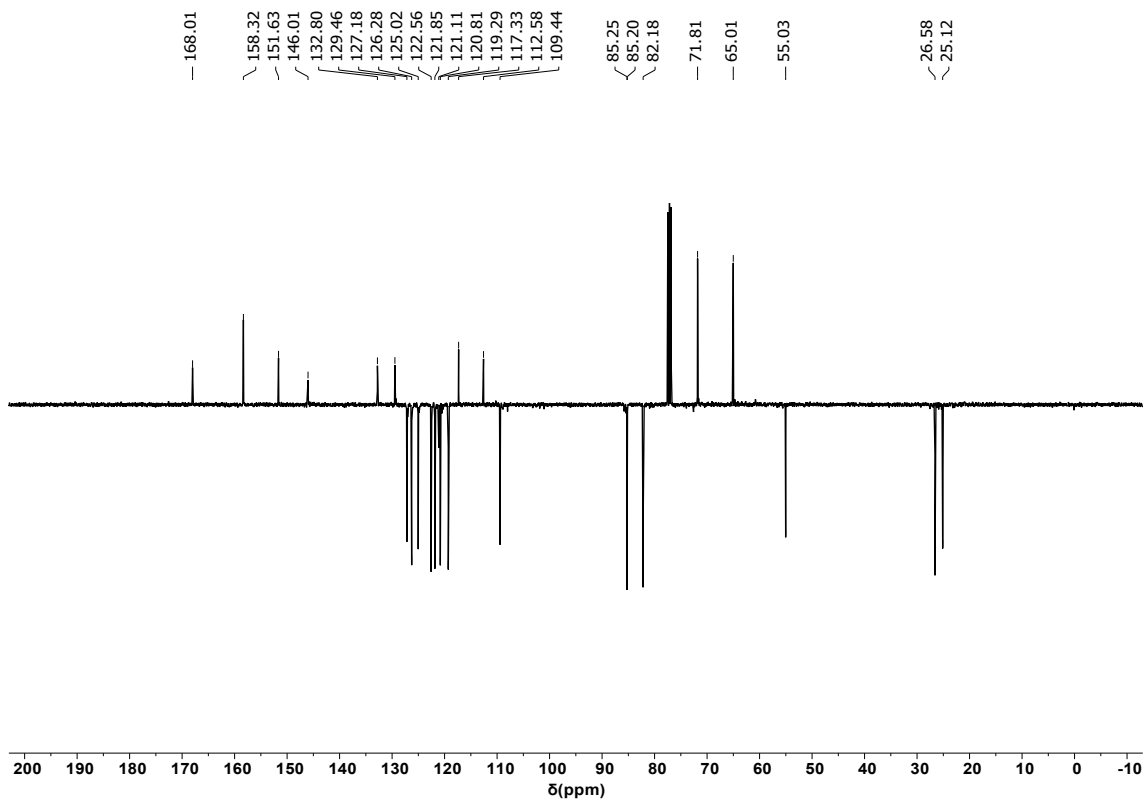

Fig. S21  $^{13}\text{C}$ -APT NMR spectrum (101 MHz,  $\text{CDCl}_3$ ) of compound 15.

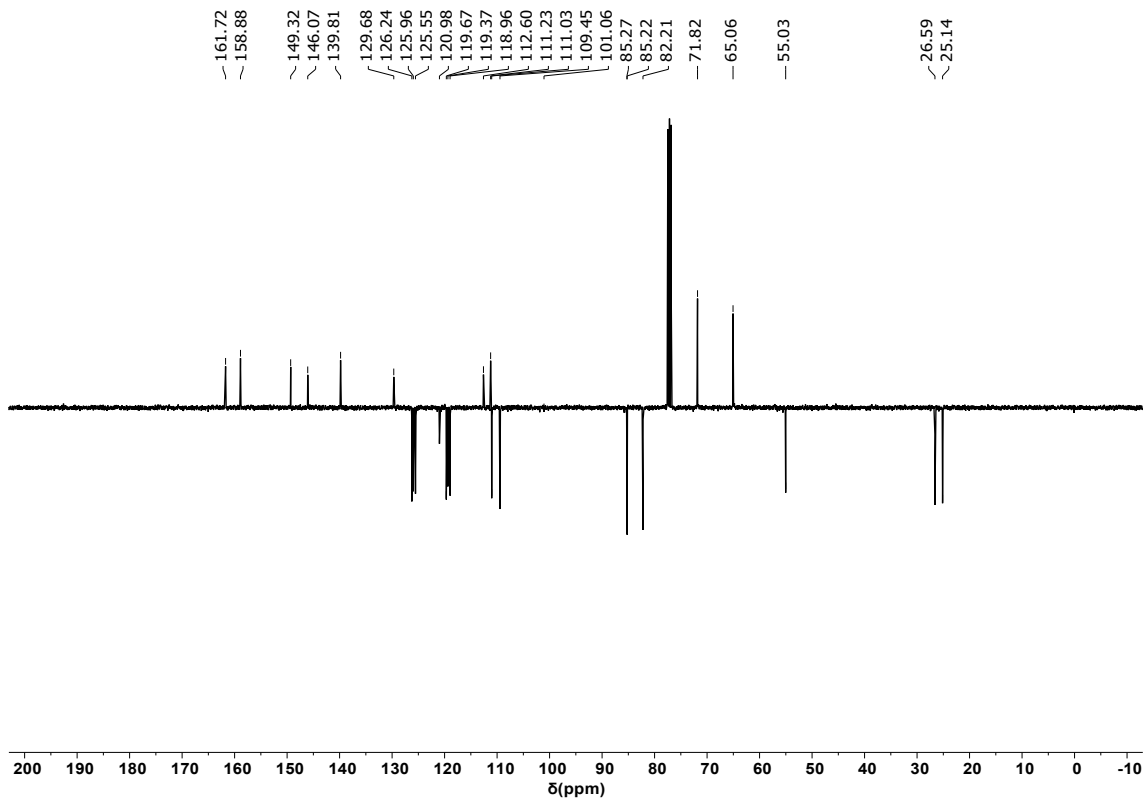

Fig. S22  $^{13}\text{C}$ -APT NMR spectrum (101 MHz,  $\text{CDCl}_3$ ) of compound 16.

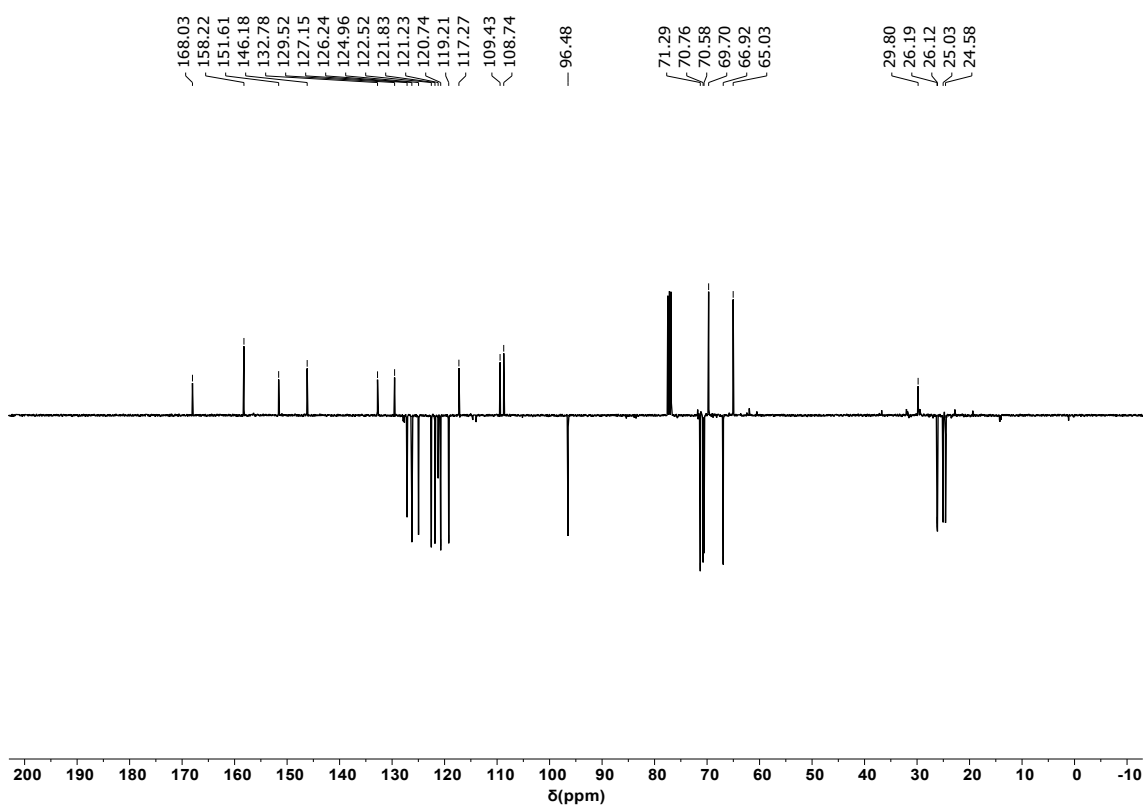

Fig. S23  $^{13}\text{C}$ -APT NMR spectrum (101 MHz,  $\text{CDCl}_3$ ) of compound 17.

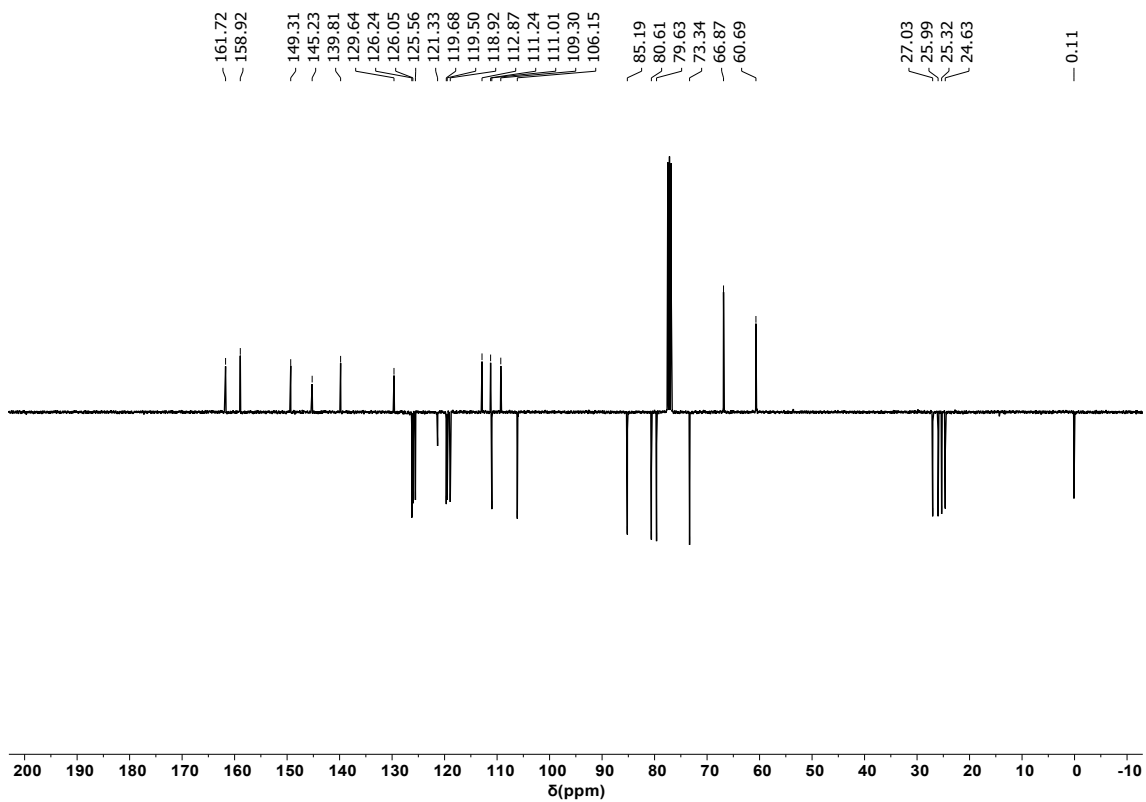

Fig. S24  $^{13}\text{C}$ -APT NMR spectrum (101 MHz,  $\text{CDCl}_3$ ) of compound 18.

### Additional UV-Vis spectra

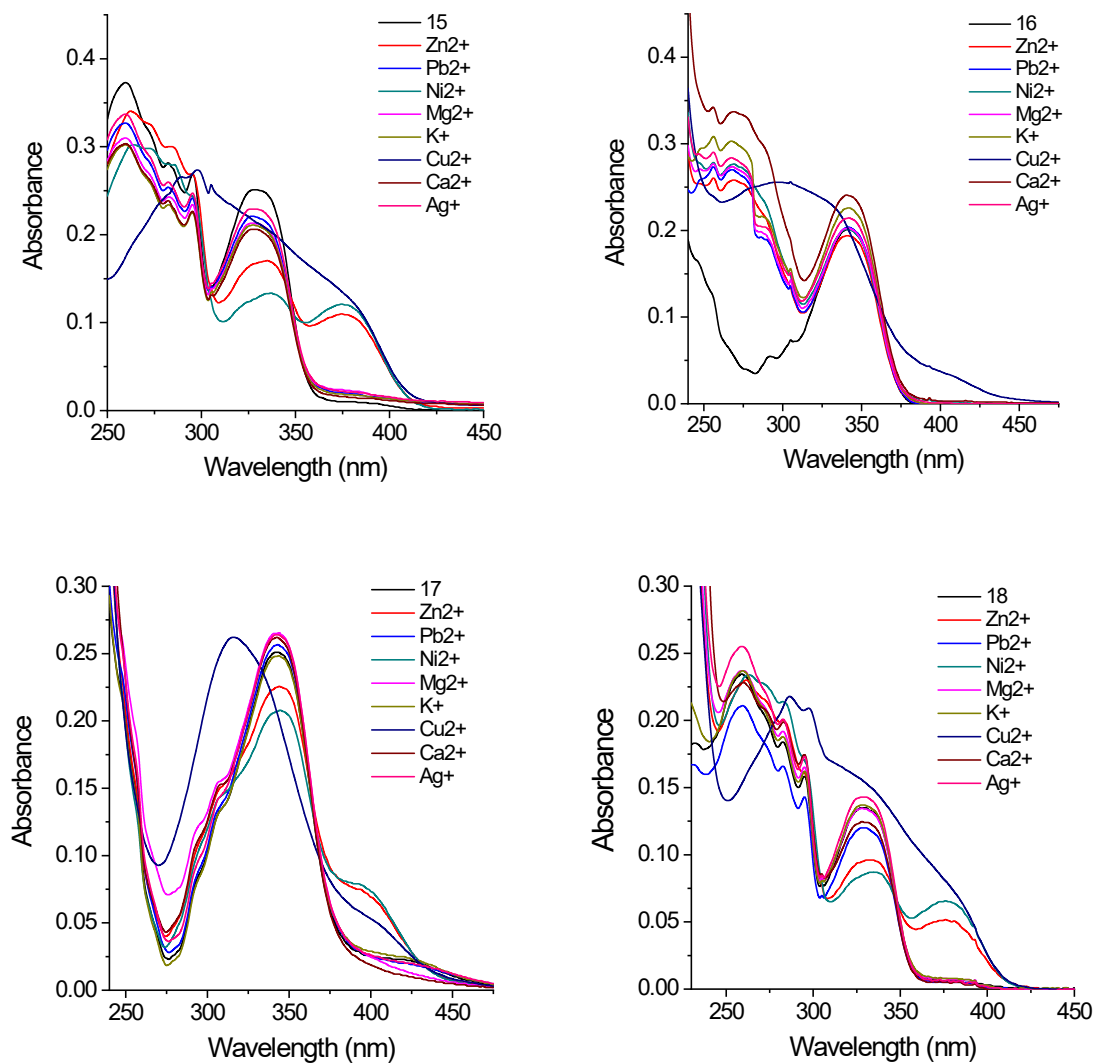

**Fig. S25** UV-Vis absorption spectra of the glycoconjugates (a) **15**, (b) **16**, (c) **17**, and (d) **18** in the presence of different  $\text{NO}_3^-$  salts (20 equiv.).

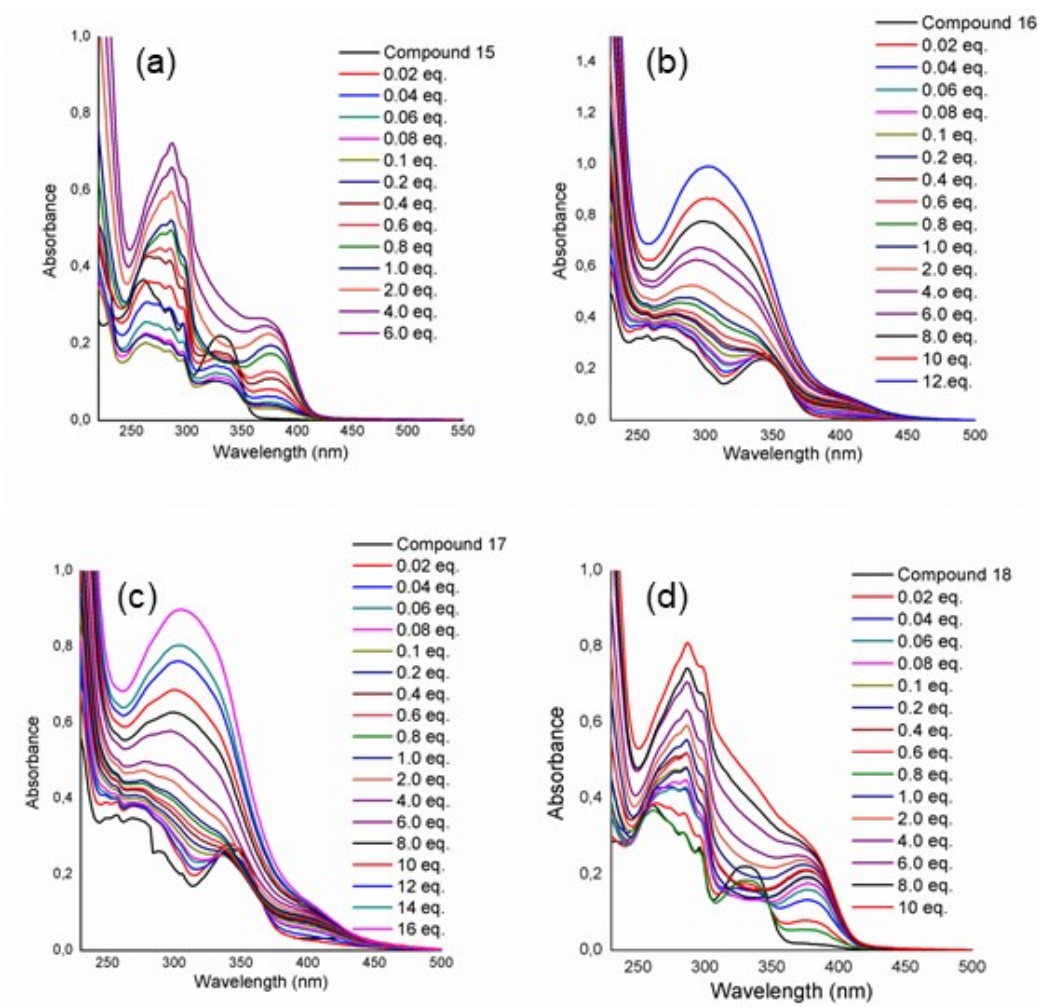

**Fig. S26** UV-Vis absorption spectra of the glycoconjugates (a) **15**, (b) **16**, (c) **17**, and (d) **18** in the presence of different  $\text{Cu}(\text{NO}_3)_2$  equivalents in acetonitrile solution,

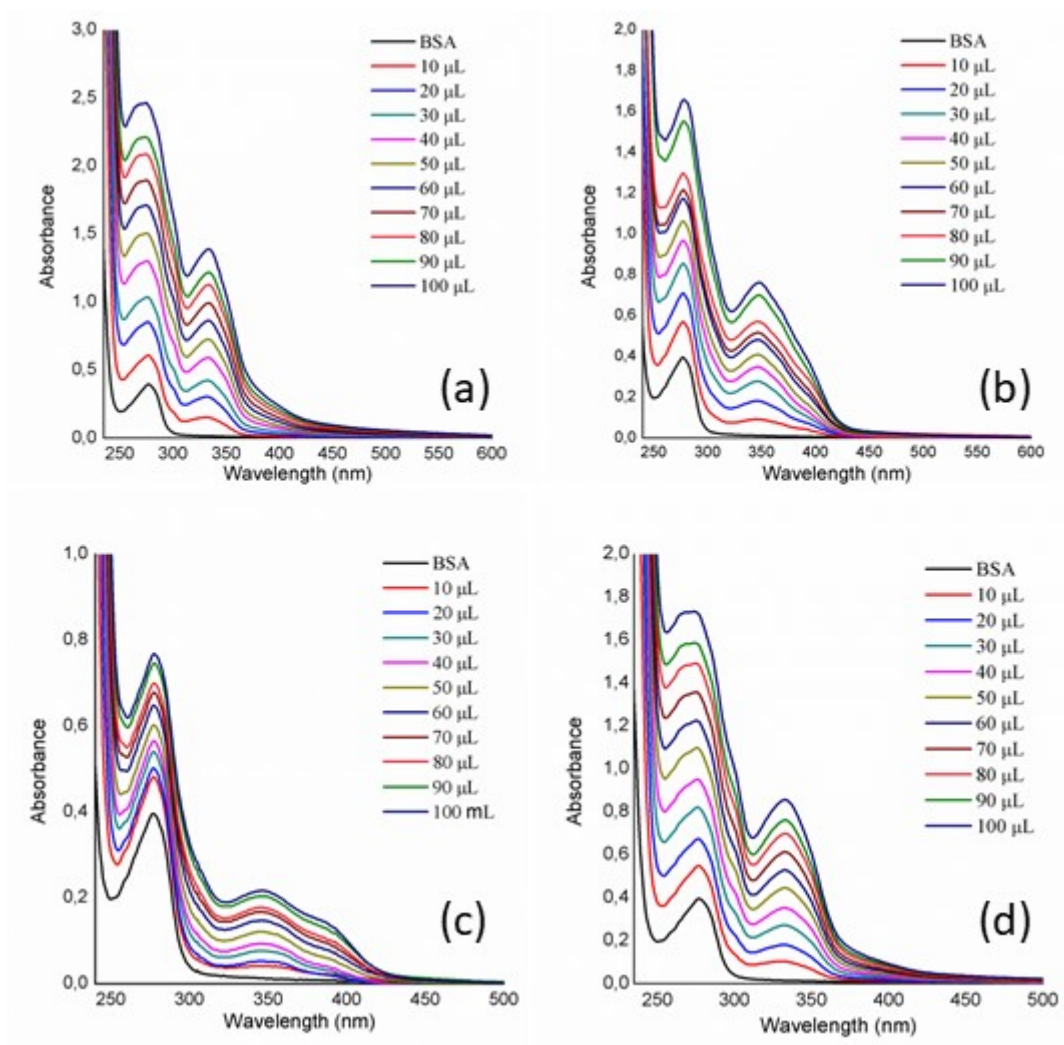

**Fig. S27** UV-Vis absorption spectra of BSA in the presence of different concentrations of glycoconjugates (a) **15**, (b) **16**, (c) **17**, and (d) **18** (10-100 μM).



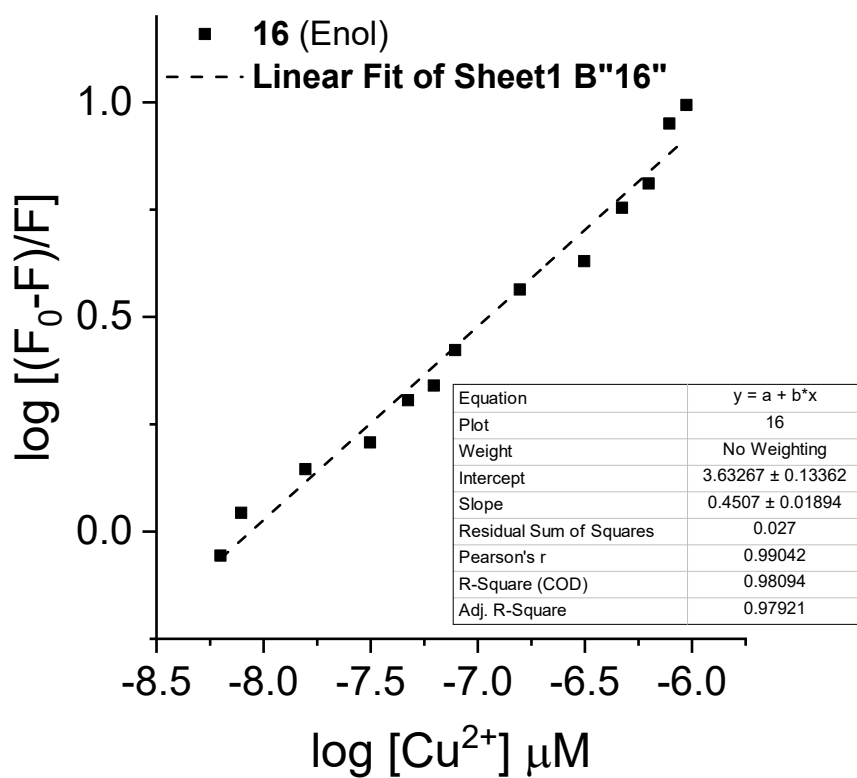

**Fig. S28** Double logarithm plots for the  $K_a$  and  $n$  calculations of glycoconjugate **16** (enol).

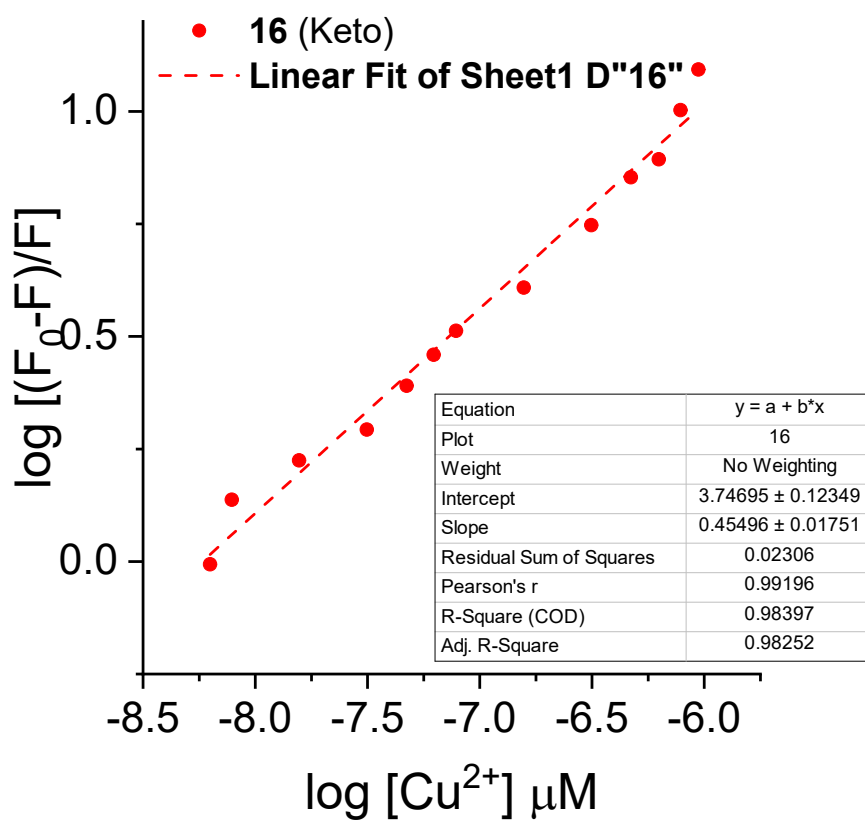

**Fig. S29** Double logarithm plots for the  $K_a$  and  $n$  calculations of glycoconjugate **16** (keto).

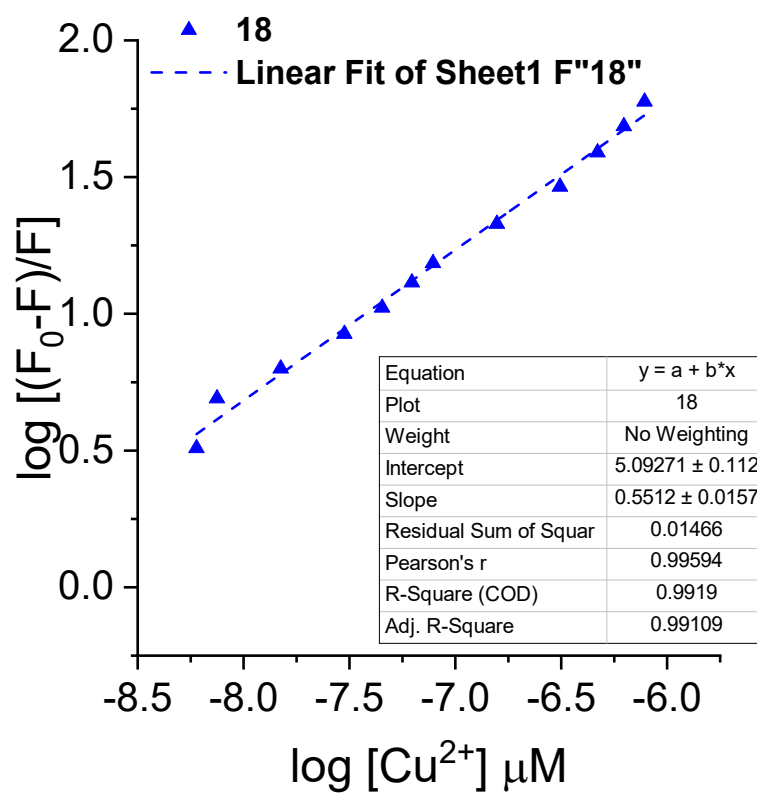

**Fig. S28** Double logarithm plots for the  $K_a$  and  $n$  calculations of glycoconjugate **18**.

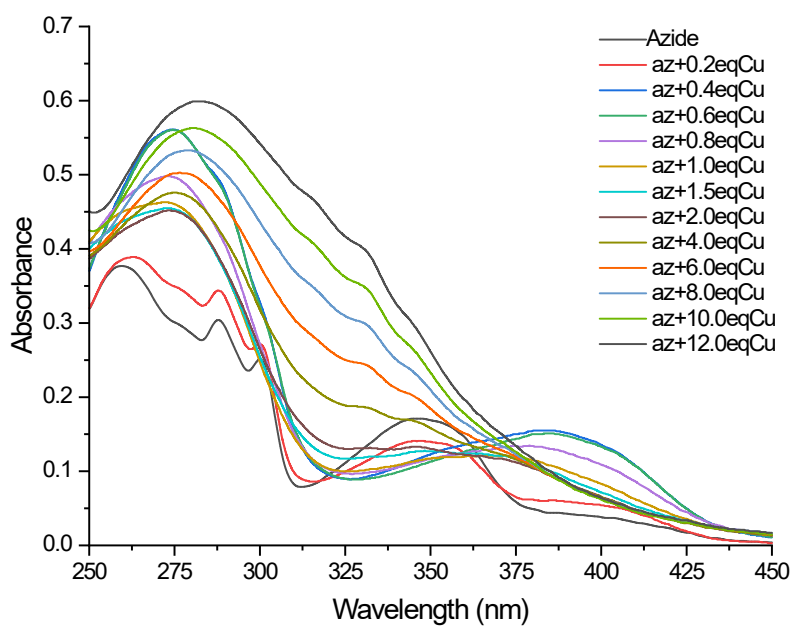

**Fig. S29** UV-Vis absorption spectra of azide **3** ( $1.92 \times 10^{-5}$  M) in the presence of different amounts of  $\text{Cu}(\text{NO}_3)_2$ .

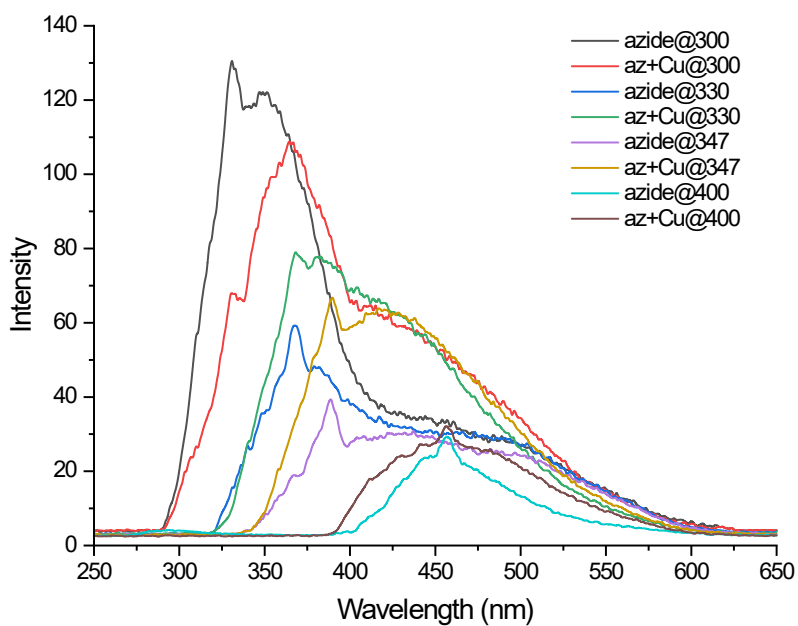

**Fig. S30** Fluorescence emission spectra of azide **3** ( $1.92 \times 10^{-5}$  M) at different excitation wavelengths in the presence of 12 equiv. of  $\text{Cu}(\text{NO}_3)_2$ .

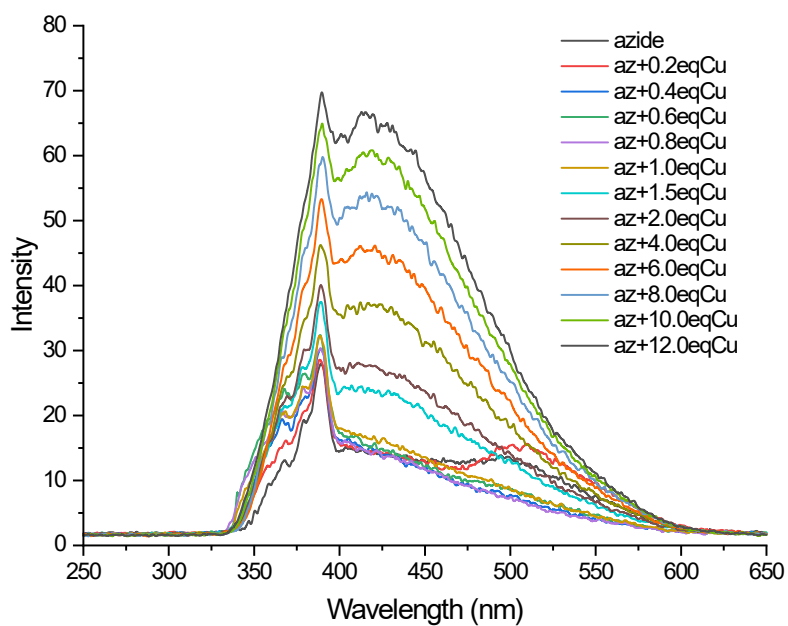

**Fig. S31** UV-Vis absorption spectra of azide **3** ( $1.92 \times 10^{-5}$  M) in the presence of different amounts of  $\text{Cu}(\text{NO}_3)_2$ . ( $\lambda = 347$  nm, Slit 5.0 nm/5.0 nm).

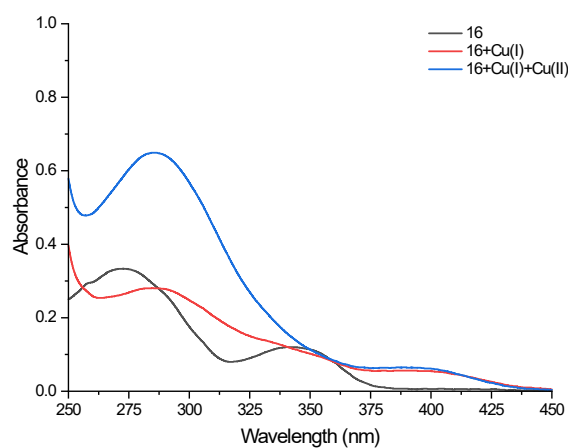

**Fig. S31** UV-Vis spectra of glycoconjugate **16** ( $1.92 \times 10^{-5}$  M) after addition of Copper(I) and Copper(II). (Slit 5.0 nm/5.0 nm).

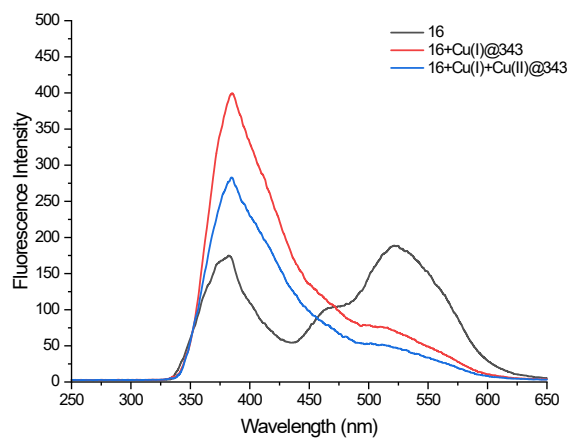

**Fig. S32** Fluorescence emission spectra of glycoconjugate **16** ( $1.92 \times 10^{-5}$  M) after addition of Copper(I) and Copper(II). (Slit 5.0 nm/5.0 nm).

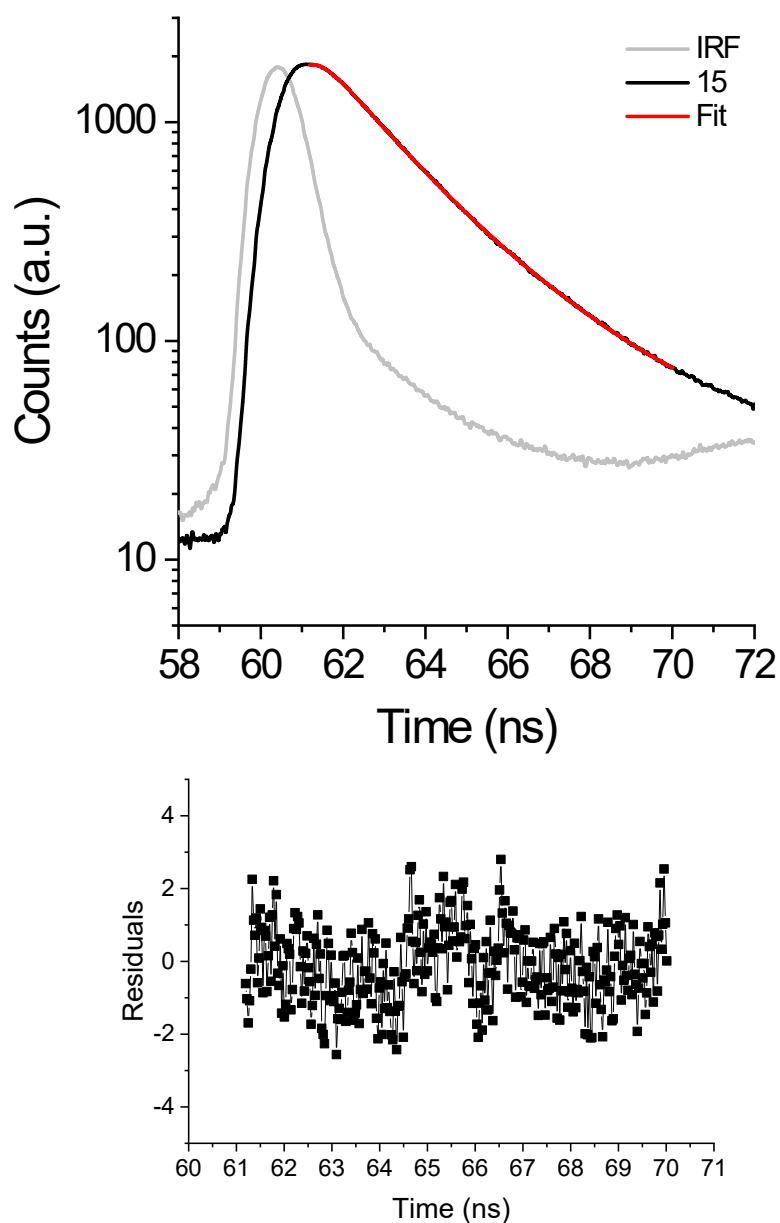

**Fig. S33** Time-resolved fluorescence decay ( $\lambda_{\text{exc}}=330$  nm) of the **15** in dichloromethane solution ( $\sim 10^{-5}$  M), IRF (instrument response factor), and respective exponential fit. Below: Residuals from the exponential fit.

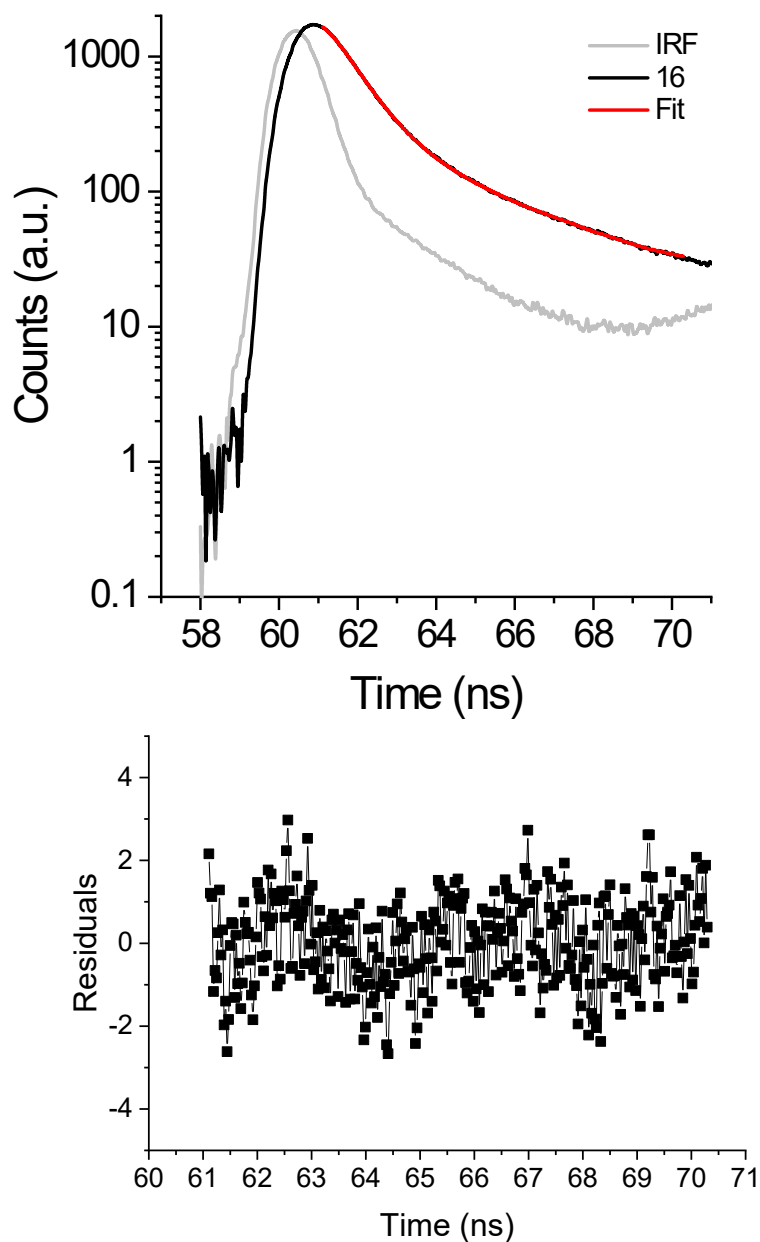

**Fig. S34** Time-resolved fluorescence decay ( $\lambda_{\text{exc}}=330$  nm) of the **16** in dichloromethane solution ( $\sim 10^{-5}$  M), IRF (instrument response factor), and respective exponential fit. Below: Residuals from the exponential fit.



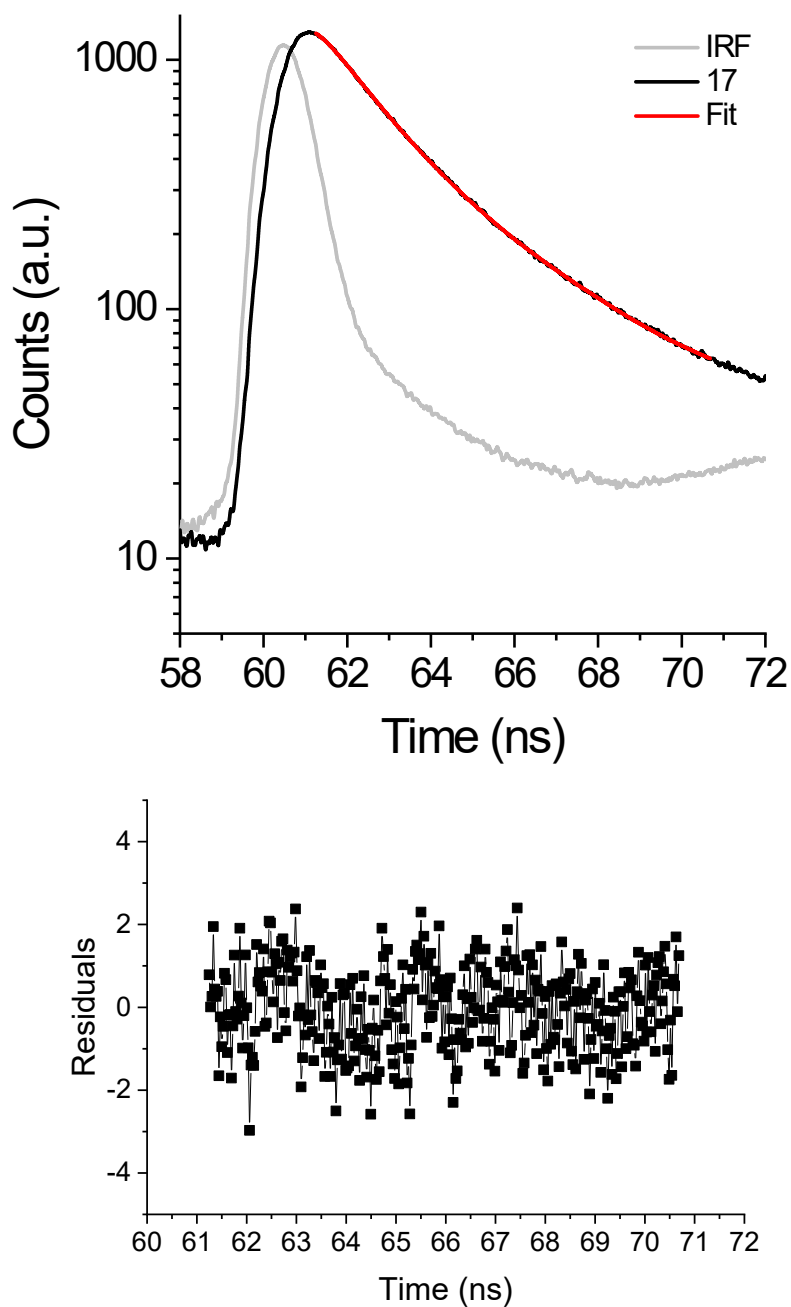

**Fig. S35** Time-resolved fluorescence decay ( $\lambda_{\text{exc}}=330$  nm) of the **17** in dichloromethane solution ( $\sim 10^{-5}$  M), IRF (instrument response factor), and respective exponential fit. Below: Residuals from the exponential fit.

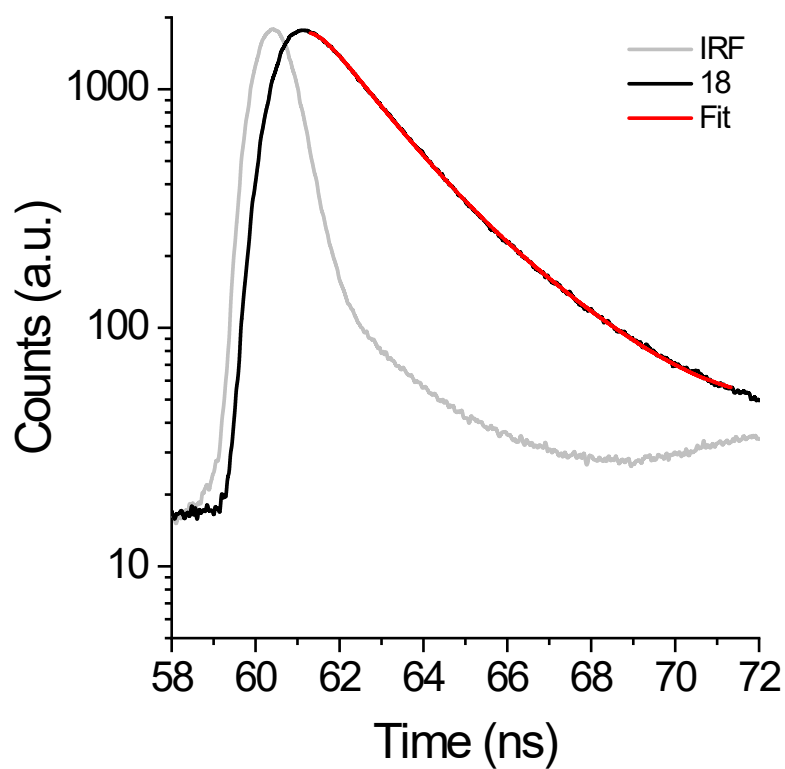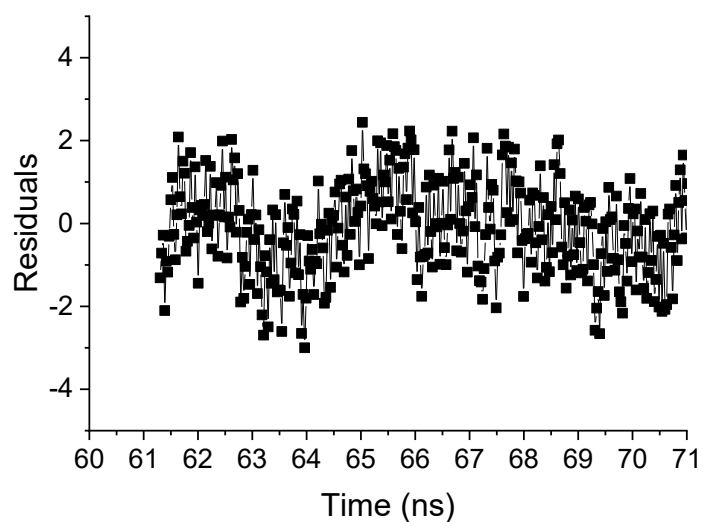

**Fig. S36** Time-resolved fluorescence decay ( $\lambda_{\text{exc}}=330$  nm) of the **18** in dichloromethane solution ( $\sim 10^{-5}$  M), IRF (instrument response factor), and respective exponential fit. Below: Residuals from the exponential fit.

## Time-resolved Spectroscopy data

\*\*\*\*\*

Decay curve : Glycoconjugate 15  
IRF curve : irf2

Start Time : 61.16  
End Time : 70.04

Offset will be calculated  
Shift will be calculated

Pre-exp. 1 : 1  
Lifetime 1 : 1  
Pre-exp. 2 : 1  
Lifetime 2 : 1

\*\*\*\*\* Statistics \*\*\*\*\*

Job done after 181 iterations in 4.821 sec.

Fitted curve : FLD Fit (46)  
Residuals : FLD Residuals (46)  
Autocorrelation : FLD Autocorrelation (46)  
Deconvolved Fit : FLD Deconvoluted (46)

Chi2 : 1.252  
Durbin Watson : 1.359  
Z : -0.07679

|            |          |                  |                        |
|------------|----------|------------------|------------------------|
| Pre-exp. 1 | : 0.1464 | $\pm 8.693e-003$ | ( 9.666 $\pm$ 0.5739%) |
| Lifetime 1 | : 17.32  | $\pm 1.523e+000$ |                        |
| Pre-exp. 2 | : 1.368  | $\pm 4.825e-003$ | ( 90.33 $\pm$ 0.3185%) |
| Lifetime 2 | : 1.554  | $\pm 4.681e-003$ |                        |

F1 : 0.5438  
F2 : 0.4562

Tau-av1 : 10.13  
Tau-av2 : 3.078

Offset : -242.2  
Shift : -0.1286

\*\*\*\*\*

\*\*\*\*\*

Decay curve : Glycoconjugate 16  
IRF curve : irf

Start Time : 61.08  
End Time : 70.32

Offset will be calculated  
Shift will be calculated

Pre-exp. 1 : 1  
Lifetime 1 : 1  
Pre-exp. 2 : 1  
Lifetime 2 : 1

\*\*\*\*\* Statistics \*\*\*\*\*

Job done after 90 iterations in 2.48 sec.

Fitted curve : FLD Fit (95)  
Residuals : FLD Residuals (95)  
Autocorrelation : FLD Autocorrelation (95)  
Deconvolved Fit : FLD Deconvoluted (95)

Chi2 : 1.466  
Durbin Watson : 1.421  
Z : -0.01761

Pre-exp. 1 : 0.08194 ± 3.539e-003 (3.435 ± 0.1483%)  
Lifetime 1 : 11.47 ± 1.365e+000  
Pre-exp. 2 : 2.304 ± 9.299e-003 (96.57 ± 0.3898%)  
Lifetime 2 : 0.7059 ± 3.590e-003

F1 : 0.3662  
F2 : 0.6338

Tau-av1 : 4.646  
Tau-av2 : 1.075

Offset : -59.87  
Shift : 0.04997

\*\*\*\*\*

\*\*\*\*\*

Decay curve : Glycoconjugate 17  
IRF curve : irf

Start Time : 61.22  
End Time : 70.71

Offset will be calculated  
Shift will be calculated

Pre-exp. 1 : 1  
Lifetime 1 : 1  
Pre-exp. 2 : 1  
Lifetime 2 : 10

\*\*\*\*\* Statistics \*\*\*\*\*

Job done after 43 iterations in 1.295 sec.

Fitted curve : FLD Fit (25)  
Residuals : FLD Residuals (25)  
Autocorrelation : FLD Autocorrelation (25)  
Deconvolved Fit : FLD Deconvoluted (25)

Chi2 : 1.085  
Durbin Watson : 1.549  
Z : -0.02834

Pre-exp. 1 : 1.51 ± 1.390e-002 ( 87.3 ± 0.8033%)  
Lifetime 1 : 1.405 ± 1.059e-002  
Pre-exp. 2 : 0.2198 ± 6.933e-003 ( 12.7 ± 0.4007%)  
Lifetime 2 : 10.54 ± 1.202e+000

F1 : 0.4781  
F2 : 0.5219

Tau-av1 : 6.174  
Tau-av2 : 2.566

Offset : -148  
Shift : 0.1835

\*\*\*\*\*

\*\*\*\*\*

Decay curve : Glycoconjugate 18  
IRF curve : irf2

Start Time : 61.28  
End Time : 71.36

Offset will be calculated  
Shift will be calculated

Pre-exp. 1 : 1  
Lifetime 1 : 1  
Pre-exp. 2 : 1  
Lifetime 2 : 1

\*\*\*\*\* Statistics \*\*\*\*\*

Job done after 100 iterations in 3.276 sec.

Fitted curve : FLD Fit (71)  
Residuals : FLD Residuals (71)  
Autocorrelation : FLD Autocorrelation (71)  
Deconvolved Fit : FLD Deconvoluted (71)

Chi2 : 1.448  
Durbin Watson : 1.437  
Z : -0.04191

|            |          |                                |
|------------|----------|--------------------------------|
| Pre-exp. 1 | : 1.315  | ± 5.797e-003 ( 89.71± 0.3953%) |
| Lifetime 1 | : 1.487  | ± 4.446e-003                   |
| Pre-exp. 2 | : 0.1509 | ± 7.659e-003 ( 10.29± 0.5223%) |
| Lifetime 2 | : 18.82  | ± 1.256e+000                   |

F1 : 0.4079  
F2 : 0.5921

Tau-av1 : 11.75  
Tau-av2 : 3.271

Offset : -257.5  
Shift : -0.1057

\*\*\*\*\*

### Additional Docking data

**Table S1** The main amino acid residues and intermolecular forces for the interaction BSA-glycoconjugates **15-18** into site I of BSA.

| Sample    | Amino acid residues     | Interaction   | Distance (Å) |
|-----------|-------------------------|---------------|--------------|
| <b>15</b> | Trp-213                 | Hydrophobic   | 3.78         |
|           | Trp-213                 | Hydrogen bond | 2.34         |
|           | Arg-217                 | Hydrogen bond | 2.98         |
|           | Ser-342                 | Hydrophobic   | 3.51         |
|           | Ser-343                 | Hydrogen bond | 2.10         |
|           | Leu-346                 | Hydrophobic   | 3.24         |
|           | Asp-450                 | Hydrogen bond | 2.89         |
|           | Ser-453                 | Hydrogen bond | 2.13         |
|           | Leu-480                 | Hydrophobic   | 3.26         |
| <b>16</b> | Trp-213                 | Hydrogen bond | 3.42         |
|           | Arg-217                 | Hydrogen bond | 3.00         |
|           | Arg-217                 | $\pi$ -cation | 4.06         |
|           | Lys-294                 | Hydrogen bond | 2.10         |
|           | Val-342 (peptidic bond) | Hydrogen bond | 2.09         |
|           | Ser-343                 | Hydrogen bond | 2.99         |
|           | Arg-483                 | Hydrophobic   | 3.62         |
| <b>17</b> | Leu-197                 | Hydrophobic   | 3.34         |
|           | Ser-201                 | Hydrogen bond | 2.10         |
|           | Trp-213                 | Hydrogen bond | 2.50         |
|           | Arg-217                 | Hydrogen bond | 2.86         |
|           | Arg-217                 | $\pi$ -cation | 4.15         |
|           | Glu-291                 | Hydrophobic   | 3.95         |
|           | Lys-294                 | Hydrogen bond | 2.05         |
|           | Val-342 (peptidic bond) | Hydrogen bond | 1.88         |
|           | Ser-343                 | Hydrogen bond | 2.19         |
|           | Leu-346                 | Hydrophobic   | 3.38         |
|           | Leu-480                 | Hydrophobic   | 3.40         |
| Ser-453   | Hydrogen bond           | 2.22          |              |
| <b>18</b> | Trp-213                 | Hydrophobic   | 3.83         |
|           | Trp-213                 | Hydrogen bond | 2.38         |
|           | Arg-217                 | Hydrogen bond | 2.86         |
|           | Val-342                 | Hydrophobic   | 3.35         |
|           | Ser-343                 | Hydrogen bond | 2.07         |
|           | Leu-346                 | Hydrophobic   | 2.95         |
|           | Arg-409                 | $\pi$ -cation | 4.72         |
|           | Lys-413                 | $\pi$ -cation | 3.40         |
|           | Asp-450                 | Hydrogen bond | 3.30         |
|           | Ser-453                 | Hydrogen bond | 2.09         |
|           | Leu-490                 | Hydrophobic   | 3.37         |
